# Supplementary material for: Highly mercury-resistant strains from different Colombian Amazon ecosystems affected by artisanal gold mining activities
Source: Springer Nature journal article supplement (doi:10.1007/s00253-022-11860-y), 2022-03-28
Supplement: 253_2022_11860_MOESM1_ESM.pdf [file 253_2022_11860_MOESM1_ESM.pdf]

**Applied Microbiology and Biotechnology**

**SUPPLEMENTARY MATERIAL FOR**

**Highly mercury resistant strains from different Colombian Amazon ecosystems affected by artisanal gold mining activities**

**Gladys Inés Cardona<sup>1\*</sup>, María Camila Escobar<sup>1</sup>, Alejandro Acosta-González<sup>2</sup>, Patricia Marín<sup>3</sup> & Silvia Marqués<sup>3</sup>**

<sup>1</sup> Instituto Amazónico de Investigaciones Científicas SINCHI. Bogotá. Colombia

<sup>2</sup> Faculty of Engineering. Universidad de la Sabana. Chía. Colombia

<sup>3</sup> Consejo Superior de Investigaciones Científicas. Estación Experimental del Zaidín. Department of Environmental Protection. Granada. Spain

This file contains 7 supplementary figures and 7 supplementary tables

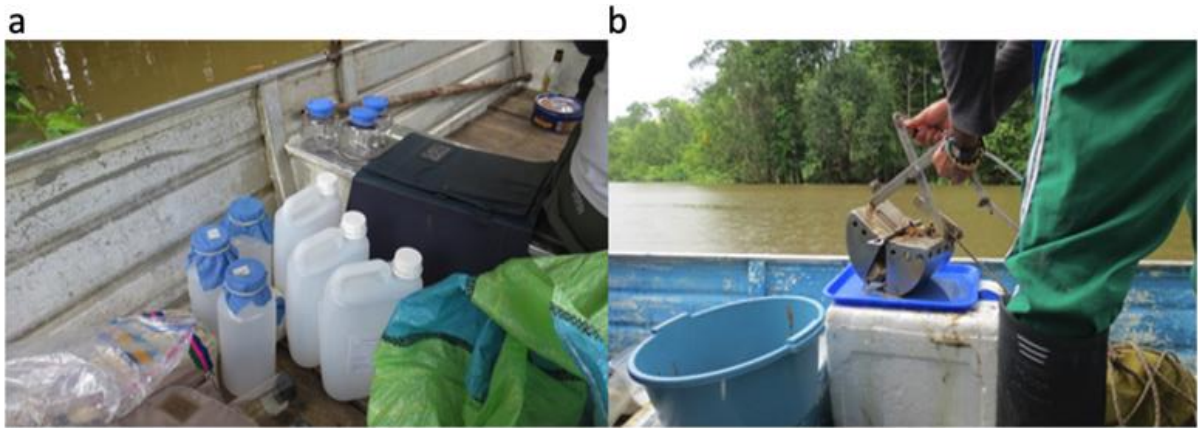

**Supplementary Fig S1 a and b.** Sampling in the Tipisca Lake (Tarapacá); a) water samples; b) sediment sampled with an Eckman-Birge type dredger.

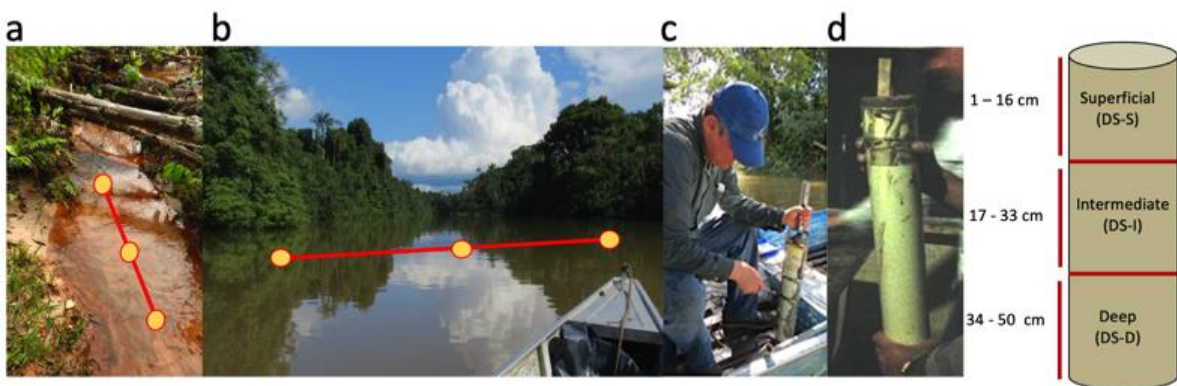

**Supplementary Fig S2 a, b, c, and d.** River water and sediment sampling in Taraira and Tarapacá. a) Location of the three replicates collected in the mouth of Cotuhé river (Tarapacá). b) Location of the three replicates collected in Caño Rojo creek. c) Deep sediment core collected in the middle of the river. d) Partition of the three layers of the deep sediment cores.

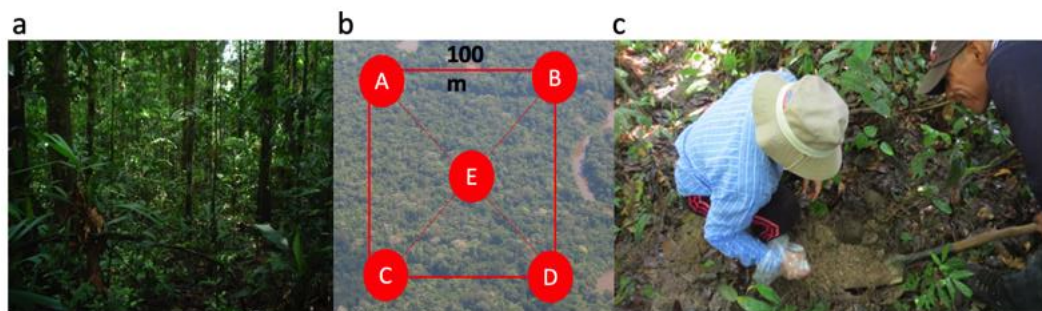

**Supplementary Fig S3 a, b and c.** a) View of the Amazon Forest in the Taraira region. b) Scheme of the sampling strategy of soil samples. The three replicates consisted of mixed sample pairs A+B, C+D and the single sample E. c) Collecting soil samples in Tarapacá Amazon Forest.

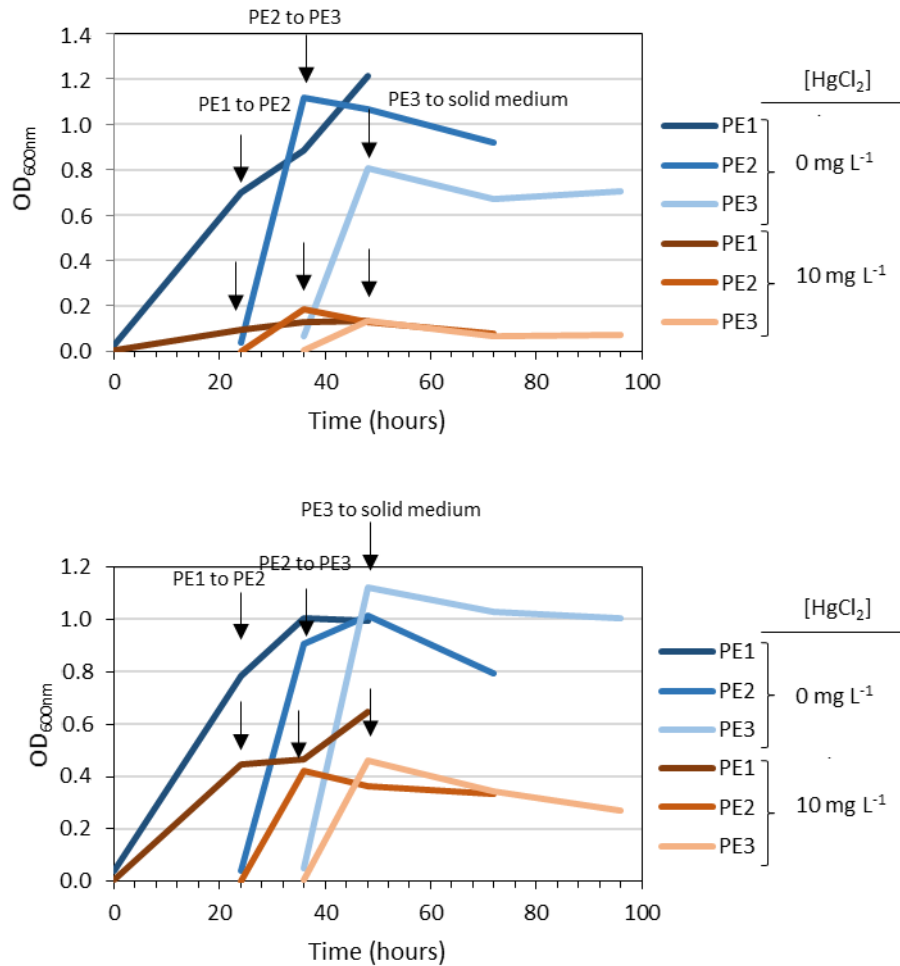

**Supplementary Figure S4. Examples of growth of the enrichment cultures.**

a) Enrichment from sediment samples collected in the upstream stretch of Caño Amarillal. b) Enrichment from sediment samples collected in the upstream stretch of Caño Rojo. The arrows indicate the dilution of the cultures (PE1, PE2 and PE3) in fresh medium with (brown) and without (blue) 10 mg HgCl<sub>2</sub> L<sup>-1</sup>. The growth curves of parallel cultures in the absence of HgCl<sub>2</sub> are shown as control.

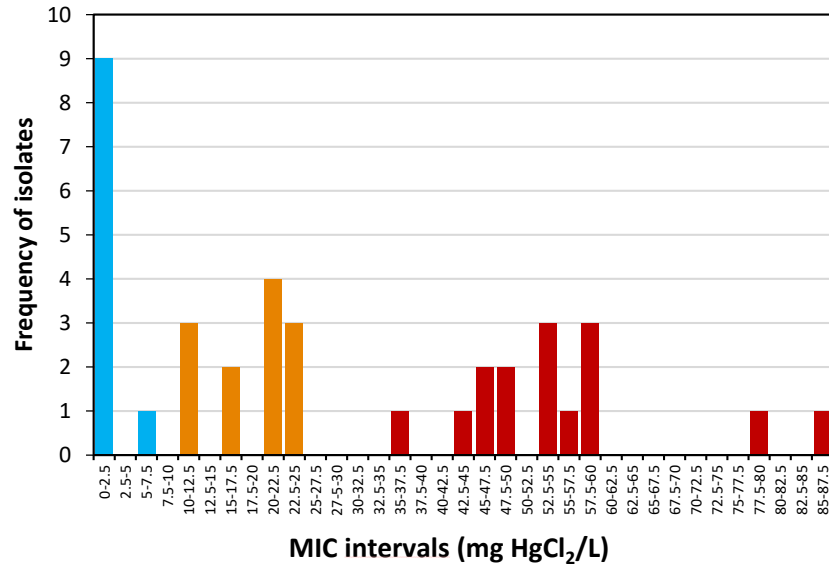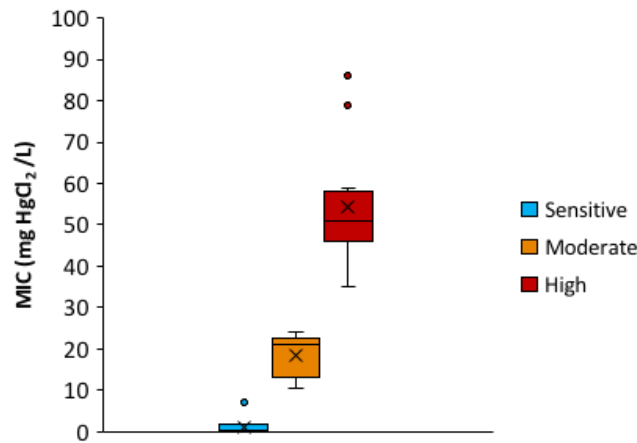

**Supplementary Figure S5.** a) Distribution of the resistance level of the isolates according to the MIC values determined in this study. The three defined classes are depicted in different colors: blue (sensitive), orange (moderately resistant) and red (highly resistant). MIC values were grouped in intervals of 2.5 mg/L HgCl<sub>2</sub>. b) MIC box-plot of the defined classes shows significant differences among them (Kruskal-Wallis: p-value =  $1.3 \times 10^{-07}$  and Kruskal-Wallis multiple comparison p-values adjusted with the Bonferroni method for High – Moderate: p= 0.001; High – Sensitive: p=2.9e-08 and Moderate – Sensitive: p= 0.02)

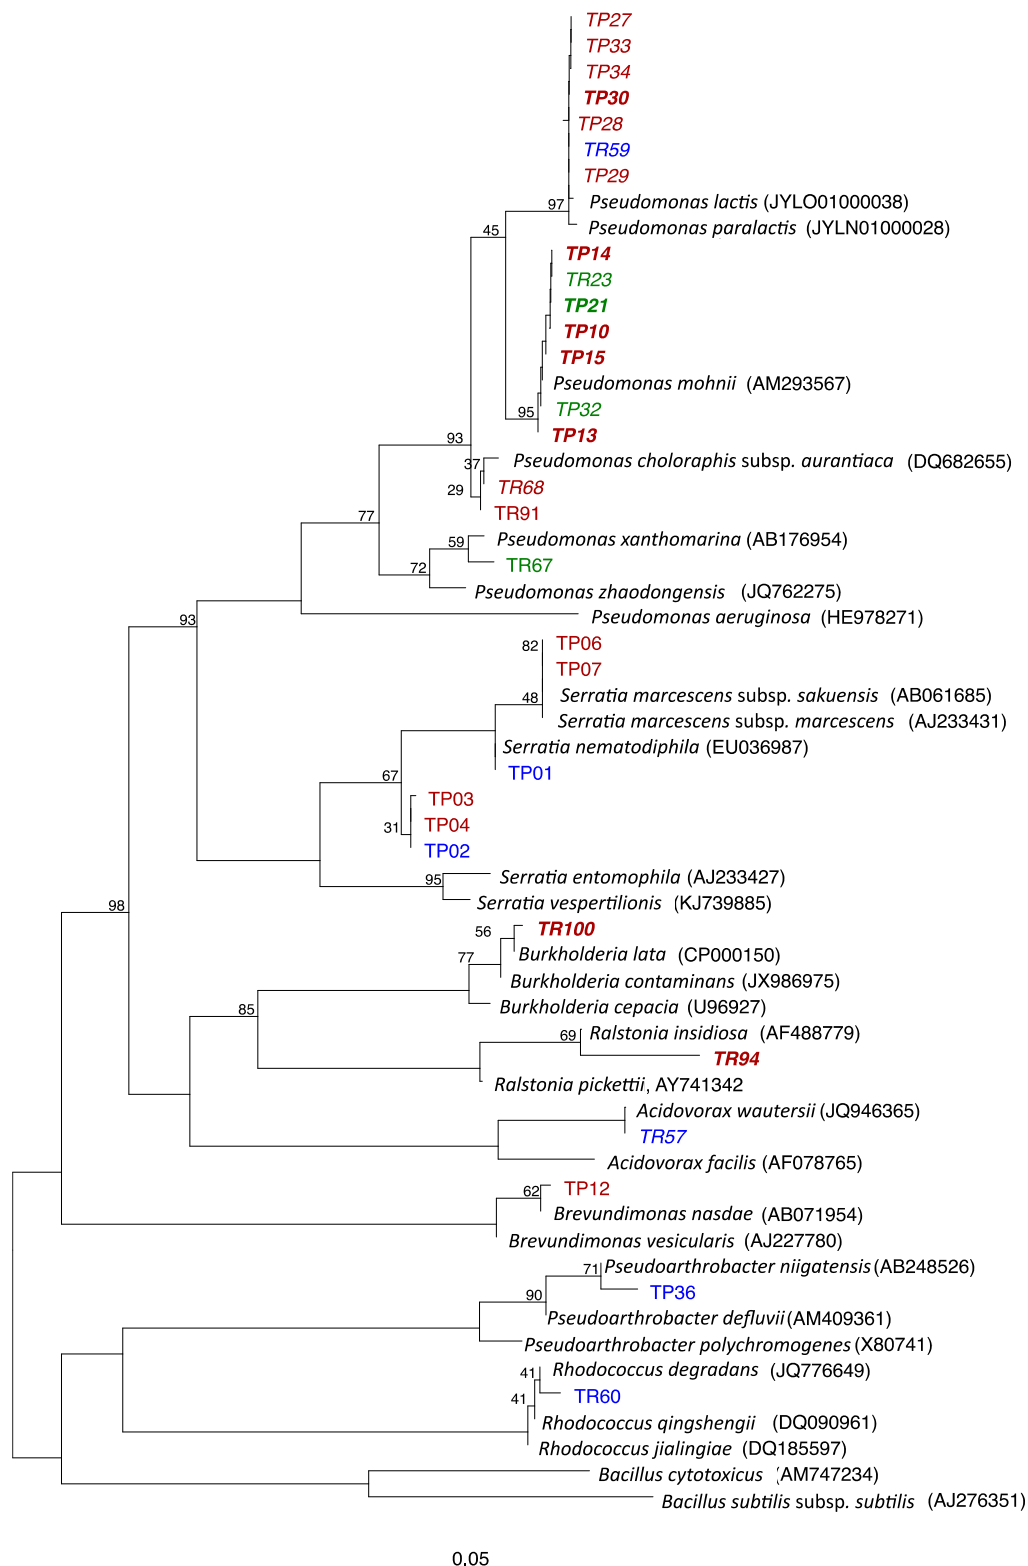

**Supplementary Figure S6a. Evolutionary relationships of the *Proteobacteria* and *Actinobacteria* isolates obtained in this study.**

The evolutionary history based on 16S rRNA gene sequences was inferred using the Neighbor-Joining method as described in the Methods section. The optimal tree is shown. The percentage of replicate trees in which the associated taxa clustered together in the bootstrap test (1000 replicates) are shown next to the branches. The tree is drawn to scale, with branch lengths in the same units as those of the evolutionary distances used to infer the phylogenetic tree. This analysis involved 58 nucleotide sequences. All ambiguous positions were removed for each sequence pair (pairwise deletion option). Isolates from water (blue), sediment (red) or forest soil (green) are in italics if they were *merA* positive. The highly resistant strains (resistant to  $\geq 30 \text{ mg L}^{-1} \text{ HgCl}_2$ ) are highlighted in bold. Strain code: TP if isolated from Tarapacá samples; TR if isolated from Tairaira samples.

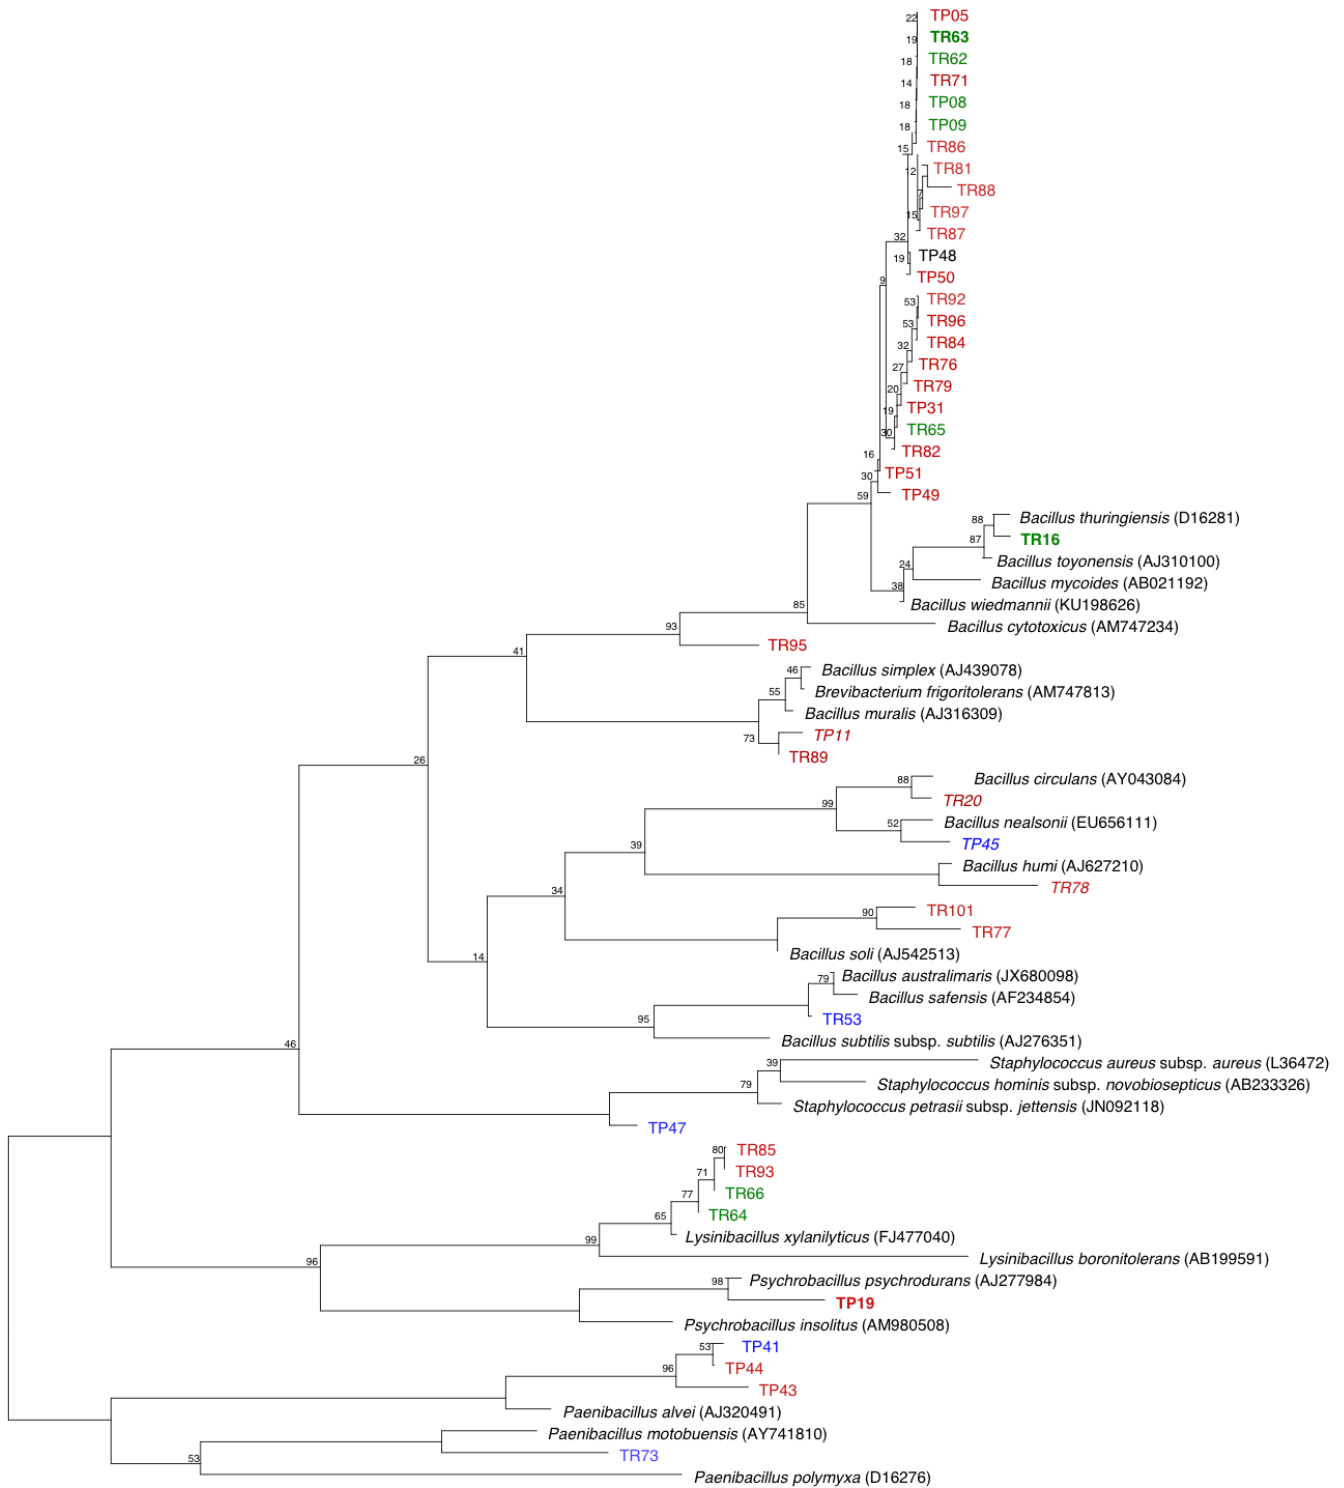

**Supplementary Figure S6b. Evolutionary relationships of the *Firmicutes* isolates obtained in this study.**

The evolutionary history based on 16S rRNA gene sequences was inferred using the Neighbor-Joining method as described in the Methods section. The optimal tree is shown. The percentage of replicate trees in which the associated taxa clustered together in the bootstrap test (1000 replicates) are shown next to the branches. The tree is drawn to scale, with branch lengths in the same units as those of the evolutionary distances used to infer the phylogenetic tree. This analysis involved 68 nucleotide sequences. All ambiguous positions were removed for each sequence pair (pairwise deletion option). Isolates from water (blue), sediment (red) or forest soil (green) are in italics if they were *merA* positive. The highly resistant strains (resistant to  $\geq 30 \text{ mg L}^{-1} \text{ HgCl}_2$ ) are highlighted in bold. Strain code: TP if isolated from Tarapacá samples; TR if isolated from Taraira samples.

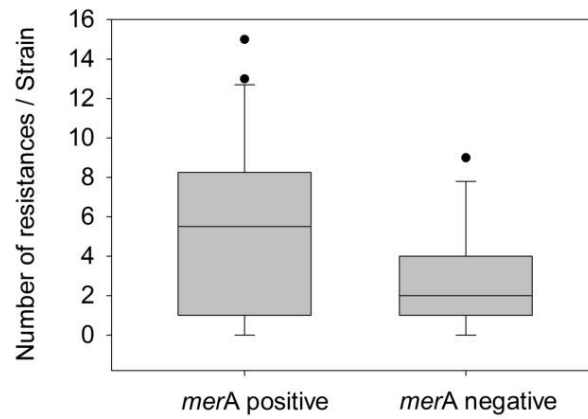

**Supplementary Figure S7. Analysis of the presence of the mercury resistance *merA* gene and antibiotic resistances in the isolates.** The data compare the number of antibiotic resistances detected in strains having or not the *merA* gene. A one-way ANOVA analysis showed the data were significantly different ( $p=0.041$ ).

**Supplementary Table S1A. Description of the sampling sites and samples in Tarapacá**

| Location              | Site             | Sample type           | Sample Code                                                                             | Description                                                                           |
|-----------------------|------------------|-----------------------|-----------------------------------------------------------------------------------------|---------------------------------------------------------------------------------------|
| Tarapacá              | Tipisca lake     | Water column          | TL-W-1                                                                                  | Collected at 25% of the total width from the shore (Supplementary Fig.S1)             |
|                       |                  |                       | TL-W-2                                                                                  | Collected in the middle of the waterbed                                               |
|                       |                  |                       | TL-W-3                                                                                  | Collected at 75% of the total width from the shore                                    |
|                       |                  | Surface sediment      | TL-SS-1                                                                                 | Collected at 25% of the total width from the shore. at 4.3 m depth.                   |
|                       |                  |                       | TL-SS-2                                                                                 | Collected in the middle of the waterbed. at 4.1 m depth.                              |
|                       |                  |                       | TL-SS-3                                                                                 | Collected at 75% of the total width from the shore at 4.2 m depth                     |
|                       |                  | Interstitial sediment | TL-IS-1                                                                                 | Core collected at the shore. Two replicates                                           |
|                       |                  |                       | TL-IS-2                                                                                 |                                                                                       |
|                       |                  | Deep sediment core    | TL-DS-1                                                                                 | Core collected at 4.15 m depth in the center of the lake. upper 1-7 cm sediment layer |
|                       | TL-DS-2          |                       | Core collected at 4.15 m depth in the center of the lake. 8-14 cm sediment layer.       |                                                                                       |
|                       | TL-DS-3          |                       | Core collected at 4.15 m depth in the center of the lake. 15-21 cm sediment layer.      |                                                                                       |
|                       | Forest soil      | TL-FS-1               | Composite samples from points A and B (Supplementary Fig.S3)                            |                                                                                       |
|                       |                  | TL-FS-2               | Composite samples from points C and D (Supplementary Fig.S3)                            |                                                                                       |
|                       |                  | TL-FS-3               | Sample collected at point E (Supplementary Fig.S3)                                      |                                                                                       |
|                       | Caño Pupuña      | Water                 | CP-W-1                                                                                  | Collected along the riverbed. Three replicates                                        |
|                       |                  |                       | CP-W-2                                                                                  |                                                                                       |
|                       |                  |                       | CP-W-3                                                                                  |                                                                                       |
|                       |                  | Surface sediment      | CP-SS-1                                                                                 | Collected along the riverbed. Three replicates                                        |
| CP-SS-2               |                  |                       |                                                                                         |                                                                                       |
| CP-SS-3               |                  |                       |                                                                                         |                                                                                       |
| Interstitial sediment |                  | CP-IS-1               | Core collected at the shore. Two replicates                                             |                                                                                       |
|                       |                  | CP-IS-2               |                                                                                         |                                                                                       |
| Deep sediment core    |                  | CP-DS-S               | Sediment core collected in the centre of the river at 6.03 m depth. superficial layer.  |                                                                                       |
|                       |                  | CP-DS-I               | Sediment core collected in the centre of the river at 6.03 m depth. intermediate layer. |                                                                                       |
|                       |                  | CP-DS-D               | Sediment core collected in the centre of the river at 6.03 m depth. deep layer.         |                                                                                       |
| Forest soil           |                  | CP-FS-1               | Composite samples from points A and B (Supplementary Fig.S3)                            |                                                                                       |
|                       |                  | CP-FS-2               | Composite samples of points C and D (Supplementary Fig.S3)                              |                                                                                       |
|                       |                  | CP-FS-3               | Sample collected at point E (Supplementary Fig.S3)                                      |                                                                                       |
| Cotuhé river mouth    |                  | Water column          | CoR-W                                                                                   | Collected in the middle of the waterbed                                               |
|                       | Surface sediment | CoR-SS                | Collected in the middle of the waterbed, at 3.9 m depth                                 |                                                                                       |
| Putumayo river        | Water column     | PR-W                  | Collected in the middle of the waterbed                                                 |                                                                                       |
|                       | Surface sediment | PR-SS                 | Collected in the middle of the waterbed, at 6.7 m depth                                 |                                                                                       |



**Supplementary Table S1B. Description of the sampling sites and samples in Taraira**

| Location                          | Site                                 | Sample type                                                                                                                   | Code                                                                         | Description                                                                            |
|-----------------------------------|--------------------------------------|-------------------------------------------------------------------------------------------------------------------------------|------------------------------------------------------------------------------|----------------------------------------------------------------------------------------|
| Taraira                           | Caño Amarillal<br>upstream stretch   | Water                                                                                                                         | CAu-W-0                                                                      | Clear, shallow surface waters. 10-15 cm depth. Three replicates                        |
|                                   |                                      |                                                                                                                               | CAu-W-1                                                                      |                                                                                        |
|                                   |                                      |                                                                                                                               | CAu-W-2                                                                      |                                                                                        |
|                                   |                                      | Surface sediment                                                                                                              | CAu-SS-0                                                                     | Sandy sediments with no macrophyte present. Three replicates                           |
|                                   |                                      |                                                                                                                               | CAu-SS-1                                                                     |                                                                                        |
|                                   |                                      |                                                                                                                               | CAu-SS-2                                                                     |                                                                                        |
|                                   |                                      | Interstitial sediment                                                                                                         | CAu-IS-0                                                                     | Collected at the shore. Two replicates.                                                |
|                                   |                                      |                                                                                                                               | CAu-IS-1                                                                     |                                                                                        |
|                                   |                                      | Forest soil<br>(secondary,<br>low forest cover)                                                                               | CAu-FS-0                                                                     | Composite samples from points A and B (Supp. Fig. S3)                                  |
|                                   | CAu-FS-1                             |                                                                                                                               |                                                                              |                                                                                        |
|                                   | CAu-FS-2                             |                                                                                                                               |                                                                              |                                                                                        |
|                                   | Caño Amarillal<br>downstream stretch | Water                                                                                                                         | CAd-W-0                                                                      | Clear, shallow surface waters. 10-15 cm depth. Three replicates                        |
|                                   |                                      |                                                                                                                               | CAd-W-1                                                                      |                                                                                        |
|                                   |                                      |                                                                                                                               | CAd-W-2                                                                      |                                                                                        |
|                                   |                                      | Surface sediment                                                                                                              | CAd-SS-0                                                                     | Sandy sediments with no macrophyte present. Three replicates.                          |
|                                   |                                      |                                                                                                                               | CAd-SS-1                                                                     |                                                                                        |
|                                   |                                      |                                                                                                                               | CAd-SS-2                                                                     |                                                                                        |
|                                   |                                      | Interstitial sediment                                                                                                         | CAd-IS                                                                       | Collected at the shore, two replicates                                                 |
|                                   |                                      | Forest soil                                                                                                                   | CAd-FS-0                                                                     | Composite samples from points A and B (Supp. Fig. S3)                                  |
|                                   |                                      |                                                                                                                               | CAd-FS-1                                                                     |                                                                                        |
|                                   | CAd-FS-2                             |                                                                                                                               |                                                                              |                                                                                        |
|                                   | Caño Rojo<br>upstream stretch        | Water                                                                                                                         | CRu-W-0                                                                      | Reddish. Shallow surface waters. Typical of the area. 10-15 cm depth. Three replicates |
|                                   |                                      |                                                                                                                               | CRu-W-1                                                                      |                                                                                        |
|                                   |                                      |                                                                                                                               | CRu-W-2                                                                      |                                                                                        |
| Surface sediment                  |                                      | CRu-SS-0                                                                                                                      | Sandy sediments with no macrophyte present. Three replicates                 |                                                                                        |
|                                   |                                      | CRu-SS-1                                                                                                                      |                                                                              |                                                                                        |
|                                   |                                      | CRu-SS-2                                                                                                                      |                                                                              |                                                                                        |
| Interstitial sediment             |                                      | CRu-IS-0                                                                                                                      | Collected at the shore, two replicates.                                      |                                                                                        |
|                                   |                                      | CRu-IS-2                                                                                                                      |                                                                              |                                                                                        |
| Forest soil (low<br>forest cover) |                                      | CRu-FS-0                                                                                                                      | Composite samples from points A and B (Supp. Fig. S3)                        |                                                                                        |
|                                   | CRu-FS-1                             |                                                                                                                               |                                                                              |                                                                                        |
|                                   | CRu-FS-2                             |                                                                                                                               |                                                                              |                                                                                        |
| Caño Rojo<br>downstream stretch   | Water                                | CRd-W-0                                                                                                                       | Dark shallow water, 20 cm depth, macrophytes present                         |                                                                                        |
|                                   |                                      | CRd-W-1                                                                                                                       |                                                                              |                                                                                        |
|                                   |                                      | CRd-W-2                                                                                                                       |                                                                              |                                                                                        |
|                                   | Surface sediment                     | CRd-SS-0                                                                                                                      | Reddish, sandy sediments, three replicates                                   |                                                                                        |
|                                   |                                      | CRd-SS-1                                                                                                                      |                                                                              |                                                                                        |
|                                   |                                      | CRd-SS-2                                                                                                                      |                                                                              |                                                                                        |
|                                   | Interstitial sediment                | CRd-IS-0                                                                                                                      | Collected at the shore, two replicates                                       |                                                                                        |
|                                   |                                      | CRd-IS-1                                                                                                                      |                                                                              |                                                                                        |
|                                   | Forest soil                          | CRd-FS-0                                                                                                                      | Composite samples from points A and B (Supp. Fig. S3)                        |                                                                                        |
| CRd-FS-1                          |                                      |                                                                                                                               |                                                                              |                                                                                        |
| CRd-FS-2                          |                                      |                                                                                                                               |                                                                              |                                                                                        |
| Deep sediment core                | CRd-DS-S                             | Core collected in the middle of the waterbed, at 35 cm depth. Divided into surface (S), intermediate (I) and deep (D) layers. |                                                                              |                                                                                        |
|                                   | CRd-DS-I                             |                                                                                                                               |                                                                              |                                                                                        |
|                                   | CRd-DS-D                             |                                                                                                                               |                                                                              |                                                                                        |
| Caño Telecom                      | Water                                | CT-W-0                                                                                                                        | Dark waters collected at 20 cm depth. Macrophytes present. Three replicates. |                                                                                        |
|                                   |                                      | CT-W-1                                                                                                                        |                                                                              |                                                                                        |
|                                   |                                      | CT-W-2                                                                                                                        |                                                                              |                                                                                        |
|                                   | Surface sediment                     | CT-SS-0                                                                                                                       | Dark, sandy sediments, three replicates                                      |                                                                                        |
|                                   |                                      | CT-SS-1                                                                                                                       |                                                                              |                                                                                        |
|                                   |                                      | CT-SS-2                                                                                                                       |                                                                              |                                                                                        |
| Interstitial sediment             | CT-IS-1                              | Collected at the shore                                                                                                        |                                                                              |                                                                                        |
| Forest soil                       | CT-FS-0                              | Composite samples from points A and B (Supp. Fig. S3)                                                                         |                                                                              |                                                                                        |
|                                   | CT-FS-1                              |                                                                                                                               |                                                                              |                                                                                        |
|                                   | CT-FS-2                              |                                                                                                                               |                                                                              |                                                                                        |

**Table S2. Homology of the *merA* gene product amplified from some isolates against sequences in the databases.**

| Strain | Taxonomy <sup>1</sup>           | Primer set |             |             |              | PCR product sequence length <sup>2</sup> | Protein sequence length | Closest MerA relative protein (refseq_protein db)                                                                                                                                                                                                               | ID   | Closest MerA relative protein (refseq_Env_protein db)                                                                                                                                     | ID   |
|--------|---------------------------------|------------|-------------|-------------|--------------|------------------------------------------|-------------------------|-----------------------------------------------------------------------------------------------------------------------------------------------------------------------------------------------------------------------------------------------------------------|------|-------------------------------------------------------------------------------------------------------------------------------------------------------------------------------------------|------|
|        |                                 | A1sn/A5n   | merA Gram + | merA Gram - | merAFA1/R A5 |                                          |                         |                                                                                                                                                                                                                                                                 |      |                                                                                                                                                                                           |      |
| TP10   | <i>Pseudomonas mohnii</i>       | +          |             | +           | +            | 1023                                     | 341                     | <i>P. mohnii</i> (WP_198132017.1)<br>Other <i>Pseudomonas</i> ( <i>P. aeruginosa</i> , <i>P. proteolytica</i> , <i>P. fulva</i> ) and betaproteobacteria ( <i>Acidovorax soli</i> , <i>Burkholderia multivorans</i> , <i>Enterobacter hormaechei</i> ) species. | 100  | Hypothetical protein GOS_1986747 - marine metagenome (EDA51843.1). Surface water marine samples, collected along a voyage from Eastern North American coast to the Eastern Pacific Ocean. | 94.7 |
| TP13   | <i>Pseudomonas mohnii</i>       | +          |             | +           | +            | 1092                                     | 364                     |                                                                                                                                                                                                                                                                 |      |                                                                                                                                                                                           | 95   |
| TP14   | <i>Pseudomonas mohnii</i>       | +          |             | +           | +            | 1077                                     | 359                     |                                                                                                                                                                                                                                                                 |      |                                                                                                                                                                                           | 94.9 |
| TP15   | <i>Pseudomonas mohnii</i>       | +          |             | +           | +            | 1119                                     | 373                     |                                                                                                                                                                                                                                                                 |      |                                                                                                                                                                                           | 94.9 |
| TP21   | <i>Pseudomonas mohnii</i>       |            |             | +           | +            | 1059                                     | 353                     |                                                                                                                                                                                                                                                                 |      |                                                                                                                                                                                           | 94.6 |
| TR23   | <i>Pseudomonas mohnii</i>       |            |             | +           | +            | 1065                                     | 355                     |                                                                                                                                                                                                                                                                 |      |                                                                                                                                                                                           | 94.6 |
| TP32   | <i>Pseudomonas mohnii</i>       | +          |             |             | +            | 1059                                     | 353                     |                                                                                                                                                                                                                                                                 |      |                                                                                                                                                                                           | 94.9 |
| TP27   | <i>Pseudomonas paralactis</i>   |            |             | +           | +            | 486                                      | 162                     | <i>P. coronafaciens</i> (WP_122364113.1)<br>Other <i>Pseudomonas</i> species ( <i>P. Syringae</i> , <i>P. aeruginosa</i> , <i>P. monteilii</i> , <i>P. fluorescens</i> ).                                                                                       | 100  | Hypothetical protein LCGC14_0114400 - marine sediment metagenome (KKO01633.1) Loki's castle hydrothermal vent sediment                                                                    | 77.1 |
| TP28   | <i>Pseudomonas paralactis</i>   |            |             | +           | +            | 1080                                     | 360                     |                                                                                                                                                                                                                                                                 |      |                                                                                                                                                                                           | 80   |
| TP29   | <i>Pseudomonas paralactis</i>   |            |             | +           | +            | 1107                                     | 369                     |                                                                                                                                                                                                                                                                 |      |                                                                                                                                                                                           | 78.3 |
| TP30   | <i>Pseudomonas paralactis</i>   |            |             | +           | +            | 1680                                     | 560                     |                                                                                                                                                                                                                                                                 |      |                                                                                                                                                                                           | 74.4 |
| TP33   | <i>Pseudomonas paralactis</i>   |            |             | +           | +            | 651                                      | 217                     |                                                                                                                                                                                                                                                                 |      |                                                                                                                                                                                           | 76.5 |
| TP34   | <i>Pseudomonas paralactis</i>   |            |             | +           | +            | 1095                                     | 365                     |                                                                                                                                                                                                                                                                 |      |                                                                                                                                                                                           | 80   |
| TR59   | <i>Pseudomonas paralactis</i>   |            |             | +           | +            | 1080                                     | 360                     |                                                                                                                                                                                                                                                                 |      |                                                                                                                                                                                           | 80   |
| TR68   | <i>Pseudomonas chlororaphis</i> | +          |             |             |              | 186                                      | 62                      | <i>Aromatoleum toluovorans</i> (WP_169256443.1)                                                                                                                                                                                                                 | 87.1 | Mercuric ion reductase - mine drainage metagenome (EQD39500.1).                                                                                                                           | 82.2 |
| TR57   | <i>Acidovorax wautersii</i>     | +          |             | +           | +            | 1047                                     | 349                     | <i>Pseudomonas</i> spp. (WP_011666568.1)                                                                                                                                                                                                                        | 100  | Hypothetical protein GOS_1986747 - marine                                                                                                                                                 | 100  |

|       |                                 |   |  |   |   |      |     |                                                                                                                                   |          |                                                                                                                                                                            |       |
|-------|---------------------------------|---|--|---|---|------|-----|-----------------------------------------------------------------------------------------------------------------------------------|----------|----------------------------------------------------------------------------------------------------------------------------------------------------------------------------|-------|
|       |                                 |   |  |   |   |      |     | Other betaproteobacteria ( <i>B. cenocepacia</i> , <i>A. baumannii</i> ) and gammaproteobacteria ( <i>P. monteilii</i> ) species. | 99       | metagenome (EDA51843.1). Surface water marine samples, collected from Eastern North American coast to the Eastern Pacific Ocean.                                           |       |
| TR94  | <i>Ralstonia insidiosa</i>      |   |  | + | + | 549  | 183 | <i>R. pickettii</i> (WP_024973298.1)                                                                                              | 95       | Hypothetical protein GOS_1986747 - marine metagenome (EDA51843.1). Surface water marine samples, collected from Eastern North American coast to the Eastern Pacific Ocean. | 89.6  |
| TR100 | <i>Burkholderia contaminans</i> | + |  |   |   | 1677 | 559 | <i>B. aenigmatica</i> (WP_059888155.1)                                                                                            | 99.8     | Hypothetical protein GOS_1986747 - marine metagenome (EDA51843.1). Surface water marine samples, collected from Eastern North American coast to the Eastern Pacific Ocean. | 80.5  |
| TP45  | <i>Bacillus nealsonii</i>       |   |  | + |   | 474  | 158 | <i>Streptococcus mitis</i> (WP_000630960.1) & <i>Dolosigranulum pigrum</i> (WP_181452786.1)                                       | 98.7     | Mercuric reductase (MPM78518.1). Bioreactor metagenome                                                                                                                     | 73.5  |
| TR78  | <i>Bacillus humi</i>            |   |  | + |   | 474  | 158 | <i>Cytobacillus firmus</i> (WP_061794233.1)                                                                                       | 98.7     |                                                                                                                                                                            | 73.2  |
| TP11  | <i>Bacillus frigoritolerans</i> |   |  | + |   | 438  | 146 | <i>diferent Bacillaceae species</i>                                                                                               | 95 to 98 |                                                                                                                                                                            | 75.34 |
| TR20* | <i>Bacillus circulans</i>       |   |  | + |   |      |     |                                                                                                                                   |          |                                                                                                                                                                            |       |

<sup>1</sup> Table S3

<sup>2</sup> When the *merA* gene was amplified with different primer pairs, the longest fragment was selected for further analysis.

\* No clean DNA sequence could be obtained from the amplified product.

**Supplementary Table S3A. Total mercury (THg) and methyl mercury (MeHg) concentration in the sediment samples.**

| Location | Sample   | Ecosystem        | THg (mg Kg <sup>-1</sup> ) | MeHg (mg Kg <sup>-1</sup> ) |                 |
|----------|----------|------------------|----------------------------|-----------------------------|-----------------|
| Taraira  | CAu-SS-0 | Surface sediment | *1.8851                    | 0.02707                     |                 |
|          | CAu-SS-1 |                  | *10.4753                   | 0.03396                     |                 |
|          | CAu-SS-2 |                  | *3.4903                    | 0.01499                     |                 |
|          | CAd-SS-0 |                  | 0.03872                    | 0                           |                 |
|          | CAd-SS-1 |                  | 0.01218                    | 0                           |                 |
|          | CAd-SS-2 |                  | 0.01239                    | 0                           |                 |
|          | CRu-SS-0 |                  | 0.06                       | 0                           |                 |
|          | CRu-SS-1 |                  | 0.09097                    | 0                           |                 |
|          | CRu-SS-2 |                  | 0.06356                    | 0                           |                 |
|          | CRd-SS-0 |                  | *0.1208                    | 0                           |                 |
|          | CRd-SS-1 |                  | *0.4668                    | 0.00301                     |                 |
|          | CRd-SS-2 |                  | *0.1212                    | 0                           |                 |
|          | CT-SS-0  |                  | 0.01868                    | 0                           |                 |
|          | CT-SS-1  |                  | 0.02689                    | 0                           |                 |
|          | CT-SS-2  |                  | 0.03895                    | 0                           |                 |
|          | CAu-IS-0 |                  | Interstitial sediment      | *1.42                       | nd <sup>1</sup> |
|          | CAu-IS-1 |                  |                            | *6.47                       |                 |
|          | CAd-IS   |                  |                            | 0.0096                      |                 |
|          | CRu-IS-0 |                  |                            | *0.099                      |                 |
|          | CRu-IS-2 |                  |                            | *0.094                      |                 |
|          | CRd-IS-0 |                  |                            | 0.076                       |                 |
|          | CRd-IS-1 |                  |                            | *0.2446                     |                 |
|          | CT-IS-1  |                  |                            | 0.0054                      |                 |
|          | CRd-C-S  |                  |                            | Deep sediment               |                 |
| CRd-C-I  | *0.1162  |                  |                            |                             |                 |
| CRd-C-D  | *0.4187  |                  |                            |                             |                 |
| Tarapacá | TL-SS-1  | Surface sediment | *0.0969                    | 0.015                       |                 |
|          | TL-SS-2  |                  | 0.033                      | 0.007                       |                 |
|          | TL-SS-3  |                  | 0.0857                     | 0.003                       |                 |
|          | CP-SS-1  |                  | 0.0783                     | 0.002                       |                 |
|          | CP-SS-2  |                  | 0.0644                     | 0.002                       |                 |
|          | CP-SS-3  |                  | 0.0677                     | 0.003                       |                 |
|          | CoR-SS   |                  | *0.1013                    | 0.004                       |                 |
|          | PR-SS    |                  | 0.0618                     | 0.003                       |                 |
|          | TL-IS-1  |                  | Interstitial sediment      | 0.085                       | nd              |
|          | TL-IS-2  |                  |                            | 0.076                       |                 |
|          | TL-DS-1  |                  | Deep sediment              | 0.081                       | nd              |
|          | TL-DS-2  |                  |                            | 0.074                       |                 |
|          | TL-DS-3  |                  |                            | 0.088                       |                 |
|          | CP-IS-1  |                  | Interstitial sediment      | 0.079                       | nd              |
|          | CP-IS-2  |                  |                            | 0.087                       |                 |
|          | CP-C-S   |                  | Deep sediment              | *0.101                      | nd              |
| CP-C-I   | 0.093    |                  |                            |                             |                 |
| CP-C-D   | *0.095   |                  |                            |                             |                 |

<sup>1</sup> Not determined

\* Asterisks indicate values above the threshold limit.

**Supplementary Table S3B. Total mercury (THg) and methyl mercury (MeHg) concentration in the water samples.**

| Sample  | Location | THg (mg L <sup>-1</sup> ) | MeHg (mg L <sup>-1</sup> ) |
|---------|----------|---------------------------|----------------------------|
| CAu-W-0 |          | 0.00027                   | <0.001 <sup>1</sup>        |
| CAu-W-1 |          | 0.00175                   | <0.001                     |
| CAu-W-2 |          | 0.00027                   | <0.001                     |
| CAd-W-0 |          | * 0.10000                 | <0.001                     |
| CAd-W-1 |          | 0.00017                   | <0.001                     |
| CAd-W-2 |          | 0.00014                   | <0.001                     |
| CRu-W-0 | Taraira  | 0.0002                    | <0.001                     |
| CRu-W-1 |          | 0.00087                   | <0.001                     |
| CRu-W-2 |          | 0.0003                    | <0.001                     |
| CRd-W-0 |          | 0.0002                    | <0.001                     |
| CRd-W-1 |          | 0.00017                   | <0.001                     |
| CRd-W-2 |          | 0.00017                   | <0.001                     |
| CT-W-0  |          | 0.0002                    | <0.001                     |
| CT-W-1  |          | *0.1000                   | <0.001                     |
| CT-W-2  |          | *0.1000                   | <0.001                     |
| TL-W-1  |          | 0.00017                   | 0                          |
| TL-W-2  |          | 0.00015                   | 0                          |
| TL-W-3  |          | 0.00017                   | 0                          |
| CP-W-1  | Tarapacá | 0.00014                   | 0                          |
| CP-W-2  |          | 0.00014                   | 0                          |
| CP-W-3  |          | 0.00014                   | 0                          |
| CoR-W   |          | 0.00017                   | 0                          |
| PR-W    |          | 0.00014                   | 0                          |

\* Asterisks indicate values above the threshold limit

<sup>1</sup> 0.001 mg L<sup>-1</sup> is the minimum detection threshold.

**Supplementary Table S3C. Total mercury (THg) and methyl mercury (MeHg) concentration in the forest soil samples.**

| Sample    | Location | THg (mg Kg <sup>-1</sup> ) | MeHg (mg Kg <sup>-1</sup> ) |
|-----------|----------|----------------------------|-----------------------------|
| CAu-FS.P0 |          | *13.2813                   | 0.02356                     |
| CAu-FS.P1 |          | *43.3488                   | 0.0498                      |
| CAu-FS.P2 |          | *1.6074                    | 0.00456                     |
| CAd-FS-0  |          | 0.22414                    | 0                           |
| CAd-FS-1  |          | 0.0719                     | 0                           |
| CAd-FS-2  |          | 0.13982                    | 0                           |
| CRu-FS-0  | Taraira  | 0.08844                    | 0                           |
| CRu-FS-1  |          | 0.26683                    | 0                           |
| CRu-FS-2  |          | 0.36115                    | 0                           |
| CRd-FS-0  |          | 0.0871                     | 0                           |
| CRd-FS-1  |          | 0.2986                     | 0                           |
| CRd-FS-2  |          | 0.1249                     | 0                           |
| CT-FS-0   |          | 0.05935                    | 0                           |
| CT-FS-1   |          | 0.07289                    | 0                           |
| CT-FS-2   |          | 0.01879                    | 0                           |
| TL-FS-1   | Tarapacá | 0.1005                     | 0.008                       |
| TL-FS-2   |          | 0.0836                     | 0.007                       |
| TL-FS-3   |          | 0.0652                     | 0.012                       |
| CP-FS-1   |          | 0.1411                     | 0.009                       |
| CP-FS-2   |          | 0.1072                     | 0.007                       |
| CP-FS-3   |          | 0.1107                     | 0.003                       |

\* Asterisks indicate values above the threshold limit

Supplementary Table S4. Bacterial isolates affiliation, origin and characteristics.

| OPU <sup>1</sup> | Isolate      | Location | Site                                         | Sample type                    | Closest relative                             | Type strain  | Identity (%)                  | Accession number | Taxonomy                                                   |              |
|------------------|--------------|----------|----------------------------------------------|--------------------------------|----------------------------------------------|--------------|-------------------------------|------------------|------------------------------------------------------------|--------------|
| 1                | TP01         | Tarapacá | Tipisca lake                                 | water                          | <i>Serratia marcescens subsp. marcescens</i> | DSM 30121    | 99.85                         | AJ233431         | Yersiniaceae<br>(Enterobacterales,<br>Gammaproteobacteria) |              |
|                  |              |          |                                              |                                | <i>Serratia marcescens subsp. Sakuensis</i>  | KRED         | 99.71                         | AB061685         |                                                            |              |
|                  |              |          |                                              |                                | <i>Serratia nematodiphila</i>                | DZ0503SBS1   | 99.71                         | EU036987         |                                                            |              |
| 2*               | TP06         | Tarapacá | Tipisca lake                                 | sediment                       | <i>Serratia marcescens subsp. Sakuensis</i>  | KRED         | 99.86                         | AB061685         |                                                            |              |
|                  |              |          |                                              |                                | <i>Serratia nematodiphila</i>                | DZ0503SBS1   | 99.72                         | EU036987         |                                                            |              |
|                  |              |          |                                              |                                | <i>Serratia marcescens subsp. marcescens</i> | DSM 30121    | 99.57                         | AJ233431         |                                                            |              |
|                  |              |          |                                              |                                | <i>Serratia marcescens subsp. Sakuensis</i>  | KRED         | 99.87                         | AB061685         |                                                            |              |
|                  |              |          |                                              |                                | <i>Serratia nematodiphila</i>                | DZ0503SBS1   | 99.74                         | EU036987         |                                                            |              |
| TP02             | Caño Pupuña  | water    | <i>Serratia marcescens subsp. Marcescens</i> | DSM 30121                      | 99.61                                        | AJ233431     |                               |                  |                                                            |              |
|                  |              |          | <i>Serratia ficaria</i>                      | DSM 4569                       | 98.77                                        | AJ233428     |                               |                  |                                                            |              |
|                  |              |          | <i>Serratia entomophila</i>                  | DSM 12358                      | 98.50                                        | AJ233427     |                               |                  |                                                            |              |
| 3*               | TP03         | Tarapacá | Tipisca lake                                 | <i>Serratia vespertilionis</i> | 52                                           | 98.50        | KJ739885                      |                  |                                                            |              |
|                  |              |          |                                              | <i>Serratia ficaria</i>        | DSM 4569                                     | 98.76        | AJ233428                      |                  |                                                            |              |
|                  |              |          |                                              | <i>Serratia entomophila</i>    | DSM 12358                                    | 98.48        | AJ233427                      |                  |                                                            |              |
|                  |              |          |                                              | <i>Serratia vespertilionis</i> | 52                                           | 98.48        | KJ739885                      |                  |                                                            |              |
|                  |              |          |                                              | <i>Serratia ficaria</i>        | DSM 4569                                     | 98.73        | AJ233428                      |                  |                                                            |              |
|                  |              |          |                                              | <i>Serratia entomophila</i>    | DSM 12358                                    | 98.44        | AJ233427                      |                  |                                                            |              |
| TP04             | Caño Pupuña  | water    | <i>Serratia vespertilionis</i>               | 52                             | 98.44                                        | KJ739885     |                               |                  |                                                            |              |
|                  |              |          | <i>Pseudomonas paralactis</i>                | DSM 29164                      | 99.87                                        | JYLN01000028 |                               |                  |                                                            |              |
| TP27             | Tipisca lake | sediment | <i>Pseudomonas lactis</i>                    | DSM 29167                      | 99.35                                        | JYLO01000038 |                               |                  |                                                            |              |
|                  |              |          | <i>Pseudomonas paralactis</i>                | DSM 29164                      | 99.85                                        | JYLN01000028 |                               |                  |                                                            |              |
| TP28             | Tipisca lake | sediment | <i>Pseudomonas paralactis</i>                | DSM 29164                      | 99.85                                        | JYLN01000028 |                               |                  |                                                            |              |
|                  |              |          | <i>Pseudomonas lactis</i>                    | DSM 29167                      | 99.55                                        | JYLO01000038 |                               |                  |                                                            |              |
| 4**              | TP29         | Tarapacá | Tipisca lake                                 | <i>Pseudomonas paralactis</i>  | DSM 29164                                    | 99.78        | JYLN01000028                  |                  |                                                            |              |
|                  |              |          |                                              | <i>Pseudomonas lactis</i>      | DSM 29167                                    | 99.48        | JYLO01000038                  |                  |                                                            |              |
|                  |              |          |                                              | <i>Pseudomonas paralactis</i>  | DSM 29164                                    | 99.83        | JYLN01000028                  |                  |                                                            |              |
|                  |              |          |                                              | <i>Pseudomonas lactis</i>      | DSM 29167                                    | 99.48        | JYLO01000038                  |                  |                                                            |              |
|                  |              |          |                                              | TP30                           | Caño Pupuña                                  | water        | <i>Pseudomonas paralactis</i> | DSM 29164        | 99.87                                                      | JYLN01000028 |
|                  |              |          |                                              |                                |                                              |              | <i>Pseudomonas lactis</i>     | DSM 29167        | 99.36                                                      | JYLO01000038 |
| TP33             | Caño Pupuña  | water    | <i>Pseudomonas paralactis</i>                | DSM 29164                      | 99.87                                        | JYLN01000028 |                               |                  |                                                            |              |
|                  |              |          | <i>Pseudomonas lactis</i>                    | DSM 29167                      | 99.36                                        | JYLO01000038 |                               |                  |                                                            |              |

|     |              |          |                    |          |                                                   |             |                |             |                                                          |
|-----|--------------|----------|--------------------|----------|---------------------------------------------------|-------------|----------------|-------------|----------------------------------------------------------|
|     | <b>TP34</b>  |          |                    |          | <i>Pseudomonas paralactis</i>                     | DSM 29164   | 99.87          | JYLN0100028 |                                                          |
|     |              |          |                    |          | <i>Pseudomonas lactis</i>                         | DSM 29167   | 99.35          | JYLO0100038 |                                                          |
|     | <b>TR59</b>  | Taraira  | Caño Amarillal     | water    | <i>Pseudomonas paralactis</i>                     | DSM 29164   | 99.85          | JYLN0100028 |                                                          |
|     |              |          |                    |          | <i>Pseudomonas lactis</i>                         | DSM 29167   | 99.54          | JYLO0100038 |                                                          |
| 5** | TR68<br>TR91 | Taraira  | Caño Amarillal     |          | <i>Pseudomonas chlororaphis subsp. Aurantiaca</i> | NCIB 10068  | 99.77<br>99.77 | DQ682655    |                                                          |
|     | TP10         |          |                    |          | <i>Pseudomonas mohnii</i>                         | IpA-2       | 100            | AM293567    |                                                          |
|     |              |          |                    |          | <i>Pseudomonas moorei</i>                         | RW10        | 99.75          | AM293566    |                                                          |
|     | TP13         |          | Cotuhé river mouth | sediment | <i>Pseudomonas mohnii</i>                         | IpA-2       | 99.93          | AM293567    |                                                          |
|     |              |          |                    |          | <i>Pseudomonas moorei</i>                         | RW10        | 99.85          | AM293566    |                                                          |
|     | TP14         | Tarapacá |                    |          | <i>Pseudomonas mohnii</i>                         | IpA-2       | 100            | AM293567    |                                                          |
|     |              |          |                    |          | <i>Pseudomonas moorei</i>                         | RW10        | 99.85          | AM293566    |                                                          |
| 6** | TP15         |          |                    |          | <i>Pseudomonas mohnii</i>                         | IpA-2       | 100            | AM293567    |                                                          |
|     |              |          |                    |          | <i>Pseudomonas moorei</i>                         | RW10        | 99.73          | AM293566    |                                                          |
|     | <b>TP21</b>  |          | Tipisca lake       |          | <i>Pseudomonas mohnii</i>                         | IpA-2       | 100            | AM293567    |                                                          |
|     |              |          |                    |          | <i>Pseudomonas moorei</i>                         | RW10        | 99.74          | AM293566    |                                                          |
|     | <b>TR23</b>  | Taraira  | Caño Rojo          |          | <i>Pseudomonas mohnii</i>                         | IpA-2       | 100            | AM293567    |                                                          |
|     |              |          |                    |          | <i>Pseudomonas moorei</i>                         | RW10        | 99.74          | AM293566    |                                                          |
|     | <b>TP32</b>  | Tarapacá | Caño Pupuña        | soil     | <i>Pseudomonas mohnii</i>                         | IpA-2       | 99.92          | AM293567    |                                                          |
|     |              |          |                    |          | <i>Pseudomonas moorei</i>                         | RW10        | 99.85          | AM293566    |                                                          |
| 7   | TR67         | Taraira  | Caño Amarillal     |          | <i>Pseudomonas xanthomarina</i>                   | KMM 1447    | 99.14          | AB176954    |                                                          |
|     |              |          |                    |          | <i>Pseudomonas zhaodongensis</i>                  | NEAU-ST5-21 | 98.90          | JQ762275    |                                                          |
| 8   | TR57         | Taraira  | Caño Rojo          | water    | <i>Acidovorax wautersii</i>                       | NF1078      | 100            | JQ946365    | Comamonadaceae (Bulkholderiales, Betaproteobacteria)     |
| 9   | <b>TR100</b> | Taraira  | Caño Rojo          |          | <i>Burkholderia contaminans</i>                   | LMG 23361   | 100            | JX986975    | Bulkholderiaceae (Bulkholderiales, Betaproteobacteria)   |
|     |              |          |                    |          | <i>Burkholderia lata</i>                          | 383         |                | CP000150    |                                                          |
| 10  | TR94         | Taraira  | Caño Rojo          | sediment | <i>Ralstonia insidiosa</i>                        | AU2944      | 98.65          | AF488779    | Betaproteobacteria)                                      |
|     |              |          |                    |          | <i>Brevundimonas vesicularis</i>                  | LMG 2350    |                | AJ227780    | Caulobacteraceae (Caulobacteriales, Alphaproteobacteria) |
| 11  | TP12         | Tarapacá | Cotuhé river mouth |          | <i>Brevundimonas nasdae</i>                       | GTC1043     | 100            | AB071954    |                                                          |
| 12  | TP36         | Tarapacá |                    | water    | <i>Pseudarthrobacter defluvii</i>                 | AM409361    | 99.21          | AM409361    |                                                          |

|      |                                                     |                     |                                                                                  |                  |                                                     |                                    |                                  |                   |                                                |
|------|-----------------------------------------------------|---------------------|----------------------------------------------------------------------------------|------------------|-----------------------------------------------------|------------------------------------|----------------------------------|-------------------|------------------------------------------------|
|      |                                                     |                     | Tipisca lake                                                                     |                  | <i>Pseudarthrobacter niigatensis</i>                | LC4                                | 99.08                            | AB248526          | Micrococcaceae (Micrococcales, Actinobacteria) |
| 13   | <b>TR60</b>                                         | Taraira             | Caño Amarillal                                                                   |                  | <i>Rhodococcus jialingiae</i>                       | djl-6-2                            |                                  | DQ185597          | Nocardiaceae (Actinomycetales, Actinobacteria) |
|      |                                                     |                     |                                                                                  |                  | <i>Rhodococcus qingshengii</i>                      | djl-6                              | 100                              | DQ090961          | (Actinomycetales, Actinobacteria)              |
|      |                                                     |                     |                                                                                  |                  | <i>Rhodococcus degradans</i>                        | CCM 4446                           |                                  | JQ776649          |                                                |
| 14   | <b>TP47</b>                                         | Tarapacá            | Putumayo river                                                                   |                  | <i>Staphylococcus petrasii subsp. jettensis</i>     | SEQ110                             | 99.21                            | JN092118          | Staphylococcaceae (Bacillales, Firmicutes)     |
|      |                                                     |                     |                                                                                  |                  | <i>Staphylococcus hominis subsp.</i>                | GTC 1228                           | 99.08                            | AB233326          |                                                |
| 15*  | TR64<br>TR66<br>TR85<br>TR93                        | Taraira             | Caño Amarillal                                                                   | soil             | <i>Lysinibacillus xylanilyticus</i>                 | XDB9                               | 99.77<br>99.76<br>99.86<br>99.73 | FJ477040          |                                                |
| 16   | <b>TP19</b>                                         | Tarapacá            | Tipisca lake                                                                     |                  | <i>Psychrobacillus psychrodurans</i>                | DSM 11713                          | 99.24                            | AJ277984          |                                                |
| 17** | TP05<br><b>TP50</b>                                 | Tarapacá            | Tipisca lake<br>Cotuhé river mouth                                               | sediment         | <i>Bacillus thuringiensis</i>                       | IAM 12077                          |                                  | D16281            |                                                |
|      |                                                     |                     |                                                                                  |                  | <i>Bacillus toyonensis</i>                          | CNCM I-1012/NCIB 40112             | 99.40                            | AJ310100          |                                                |
| 18   | TR95                                                | Taraira             | Caño Rojo                                                                        |                  | <i>Bacillus wiedmannii</i>                          | FSL W8-0169                        | 98.19                            | KU198626          |                                                |
|      |                                                     |                     |                                                                                  |                  | <i>Bacillus mycoides</i>                            | ATCC6462                           | 98.05                            | AF013121          | Bacillaceae (Bacillales, Firmicutes)           |
|      |                                                     |                     |                                                                                  |                  | <i>Bacillus thuringiensis</i>                       | IAM 12077                          |                                  | D16281            |                                                |
| 19   | <b>TP31</b>                                         | Tarapacá            | Caño Pupuña                                                                      |                  | <i>Bacillus toyonensis</i>                          | CNCM I-1012/NCIB 40112             | 99.54                            | AJ310100          |                                                |
| 20** | TP49<br>TR65<br>TR79<br><b>TR82</b><br>TR84<br>TR96 | Tarapacá<br>Taraira | Cotuhé river mouth<br>Caño Amarillal<br>Caño Rojo<br>Caño Amarillal<br>Caño Rojo | soil<br>sediment | <i>Bacillus toyonensis / Bacillus thuringiensis</i> | IAM 12077 / CNCM I-1012/NCIB 40112 | 99.41                            | AJ310100 / D16281 |                                                |
|      |                                                     |                     |                                                                                  |                  | <i>Bacillus wiedmannii</i>                          | FSL W8-0169                        | 99.54<br>99.53                   | KU198626          |                                                |
| 21   | TP51                                                | Tarapacá            |                                                                                  |                  | <i>Bacillus thuringiensis</i>                       | IAM 12077                          | 99.63                            | D16281            |                                                |



|      |                             |          |                             |          |                                                               |                                       |                |                      |  |
|------|-----------------------------|----------|-----------------------------|----------|---------------------------------------------------------------|---------------------------------------|----------------|----------------------|--|
|      |                             |          | Putumayo river              |          | <i>Bacillus toyonensis</i>                                    | CNCM I-1012/NCIB 40112                | 99.63          | AJ310100             |  |
| 22** | <b>TR76</b><br>TR92         | Taraira  | Caño Amarillal              |          | <i>Bacillus wiedmannii</i>                                    | FSL W8-0169                           | 99.87          | KU198626             |  |
| 23   | TR88                        | Taraira  | Caño Amarillal              |          | <i>Bacillus thuringiensis</i>                                 | IAM 12077                             |                | D16281               |  |
|      |                             |          |                             |          | <i>Bacillus toyonensis</i>                                    | CNCM I-1012/NCIB 40112                | 99.63          | AJ310100             |  |
|      | TP08<br>TP09                | Tarapacá | Caño Pupuña                 | soil     |                                                               |                                       |                |                      |  |
|      | <b>TP48</b>                 |          |                             | sediment |                                                               |                                       |                |                      |  |
| 24** | TR62<br>TR63                |          | Caño Amarillal              | soil     |                                                               |                                       |                |                      |  |
|      | TR71                        | Taraira  | Caño Telecom                |          | <i>Bacillus toyonensis</i> /<br><i>Bacillus thuringiensis</i> | IAM 12077 /<br>CNCM I-1012/NCIB 40112 | 99.55          | AJ310100 /<br>D16281 |  |
|      | TR86<br>TR87                |          | Caño Amarillal              |          |                                                               |                                       |                |                      |  |
|      | <b>TR81</b><br>TR97         |          | Caño Rojo                   | sediment |                                                               |                                       |                |                      |  |
| 25   | TR16                        | Taraira  | Caño Rojo                   |          | <i>Bacillus toyonensis</i> /<br><i>Bacillus thuringiensis</i> | IAM 12077 /<br>CNCM I-1012/NCIB 40112 | 100            | AJ310100 /<br>D16281 |  |
| 26   | TR53                        | Taraira  | Caño Amarillal              | water    | <i>Bacillus safensis</i>                                      | F0-036b                               | 99.85          | AF234854             |  |
|      |                             |          |                             |          | <i>Bacillus australimaris</i>                                 | MCC 1A05787                           | 99.78          | JX680098             |  |
| 27*  | TP11                        | Tarapacá | Cotuhé river mouth          |          | <i>Bacillus frigiditolerans</i>                               | DSM 8801                              | 99.48          | AM747813             |  |
|      | TR89                        | Taraira  | Caño Amarillal              | sediment | <i>Bacillus simplex</i>                                       | DSM 1221T                             | 99.34          | AJ439078             |  |
|      |                             |          |                             |          | <i>Bacillus muralis</i>                                       | LMG 20238                             | 99.34          | AJ316309             |  |
| 28*  | <b>TR77</b><br><b>TR101</b> | Taraira  | Caño Amarillal<br>Caño Rojo |          | <i>Bacillus soli</i>                                          | LMG 21838                             | 99.23<br>99.12 | AJ542513             |  |
| 29   | <b>TR78</b>                 | Taraira  | Caño Rojo                   |          | <i>Bacillus humi</i>                                          | LMG 22167                             | 99.40          | AJ627210             |  |

Bacillaceae  
(Bacillales,  
Firmicutes)

|      |             |          |              |       |                                  |           |        |             |                                                 |                            |        |
|------|-------------|----------|--------------|-------|----------------------------------|-----------|--------|-------------|-------------------------------------------------|----------------------------|--------|
| 30   | <b>TR20</b> | Taraira  | Caño Rojo    |       | <i>Bacillus circulans</i>        | -         | 100    | AY043084    |                                                 |                            |        |
| 31   | <b>TP45</b> | Tarapacá | Tipisca lake | water | <i>Bacillus circulans</i>        | -         | 98.84  | AY043084    |                                                 |                            |        |
|      |             |          |              |       | <i>Bacillus nealsonii</i>        | DSM 15077 | 98.59  | EU656111    |                                                 |                            |        |
| 32   | TR73        | Taraira  | Caño Rojo    | water | <i>Paenibacillus motobuensis</i> | MC10      | 97.72  | NR_043153.1 | Paenibacillaceae<br>(Bacillales,<br>Firmicutes) |                            |        |
|      |             |          |              |       | TP41                             | Tarapacá  | Cotuhé |             |                                                 | 98.94                      |        |
|      |             |          |              |       | TP44                             | Tarapacá  | river  | sediment    |                                                 | <i>Paenibacillus alvei</i> | DSM 29 |
| TP43 | Tarapacá    | mouth    |              |       | 98.80                            |           |        |             |                                                 |                            |        |

<sup>1</sup>OPU: Operational Phylogenetic Unit

in bold: isolated after liquid enrichment cycles.

\*OPU: cluster of isolates with shared identity of at least 99.0 %

\*\*OPU: cluster of isolates with shared identity of 100%

**Supplementary Table S5. Yeast isolates and origin.**

| <b>Strain</b> | <b>Location</b> | <b>Site</b>           | <b>Closest relative</b>         | <b>Acc. Number</b>              |
|---------------|-----------------|-----------------------|---------------------------------|---------------------------------|
| TP35          | Tarapacá        | Tipisca Lake water    | <i>Rhodotorula mucilaginosa</i> | KY611824.1                      |
| TP42          |                 | Caño Pupuña sediment  | <i>Rhodotorula mucilaginosa</i> | MG270571.1                      |
| TR52          |                 | Caño Amarillal water  | <i>Rhodotorula mucilaginosa</i> | MF628270.1                      |
| TR55          |                 |                       | <i>Yarrowia lipolytica</i>      | MH459415.1                      |
| TR58          |                 | Caño Rojo water       | <i>Aureobasidium pullulans</i>  | MH134575.1                      |
| TR69          | Taraira         | Caño Telecom sediment | <i>Rhodotorula mucilaginosa</i> | KY611824.1                      |
| TR70          |                 |                       | <i>Cryptococcus laurentii</i>   | KT899784.1                      |
| TR75          |                 |                       | <i>Candida maltosa</i>          | KY102187.1                      |
| TR80          |                 |                       | <i>Rhodotorula mucilaginosa</i> | KY611824.1                      |
| TR90          |                 |                       | Caño Amarillal sediment         | <i>Rhodotorula mucilaginosa</i> |

**Supplementary Table S6. Antibiotic resistance<sup>1</sup>. Presence of the *merA* gene and presence of plasmids in selected isolates.**

| Strain | <i>merA</i> | plasmid | Fluoro-quinolones |      |      | Beta-lactams |      |       |       |        | Amino-glycosides |     |      | CP | TC             | ML | GP | Total # of resistances |     |
|--------|-------------|---------|-------------------|------|------|--------------|------|-------|-------|--------|------------------|-----|------|----|----------------|----|----|------------------------|-----|
|        |             |         | NOR10             | OFX5 | CIP5 | AMX25        | AM10 | TIC75 | IPM10 | PIP100 | KM30             | S10 | GM10 |    |                |    |    |                        | C30 |
| TP1    | -           | -       | S                 | S    | S    | R            | R    | nd    | S     | S      | S                | S   | S    | S  | S <sup>1</sup> | S  | R  | nd                     | 3   |
| TP3    | -           | -       | S                 | S    | S    | R            | R    | nd    | S     | S      | S                | S   | S    | S  | S              | S  | S  | nd                     | 2   |
| TP7    | -           | +       | S                 | S    | S    | R            | R    | nd    | S     | S      | S                | S   | S    | S  | R              | S  | S  | nd                     | 3   |
| TP10   | +           | +       | S                 | S    | S    | R            | R    | nd    | S     | S      | S                | S   | S    | S  | S              | S  | R  | R                      | 4   |
| TP11   | +           | -       | S                 | S    | S    | S            | S    | nd    | S     | S      | S                | S   | S    | S  | S              | S  | S  | nd                     | 0   |
| TP13   | +           | -       | S                 | S    | R    | R            | R    | nd    | S     | S      | S                | S   | S    | S  | S              | R  | R  | R                      | 6   |
| TP14   | +           | +       | S                 | S    | S    | R            | R    | R     | S     | S      | S                | S   | S    | S  | S              | S  | R  | nd                     | 4   |
| TP15   | +           | +       | S                 | S    | S    | S            | S    | nd    | S     | S      | S                | S   | S    | S  | R              | S  | S  | S                      | 1   |
| TP16   | +           | +       | S                 | S    | S    | R            | R    | R     | S     | S      | S                | S   | S    | S  | S              | S  | R  | R                      | 5   |
| TP19   | +           | -       | S                 | S    | S    | S            | S    | nd    | S     | S      | S                | S   | S    | S  | R              | S  | S  | S                      | 1   |
| TP20   | +           | -       | nd                | nd   | S    | S            | nd   | S     | S     | S      | nd               | S   | S    | S  | nd             | S  | nd | nd                     | 0   |
| TP21   | +           | +       | R                 | S    | R    | R            | R    | R     | S     | S      | R                | R   | R    | R  | S              | R  | R  | R                      | 12  |
| TP23   | +           | +       | S                 | S    | S    | R            | R    | R     | S     | S      | S                | S   | S    | S  | S              | S  | R  | R                      | 5   |
| TP27   | +           | +       | S                 | S    | S    | S            | S    | nd    | S     | S      | R                | R   | S    | S  | S              | S  | S  | S                      | 2   |
| TP28   | +           | -       | S                 | S    | S    | R            | R    | nd    | S     | S      | R                | S   | S    | R  | R              | S  | R  | R                      | 7   |
| TP29   | +           | -       | S                 | S    | S    | R            | R    | nd    | S     | S      | R                | S   | S    | R  | R              | S  | R  | R                      | 7   |
| TP30   | +           | +       | S                 | R    | R    | R            | R    | R     | S     | S      | R                | R   | R    | R  | S              | R  | R  | R                      | 12  |
| TP31   | -           | -       | S                 | S    | S    | R            | R    | nd    | S     | S      | S                | S   | S    | S  | R              | S  | S  | R                      | 4   |
| TP32   | +           | -       | S                 | S    | S    | R            | R    | R     | S     | S      | S                | S   | S    | S  | S              | S  | R  | R                      | 5   |
| TP33   | +           | -       | R                 | R    | S    | R            | R    | R     | S     | S      | R                | R   | S    | R  | R              | R  | R  | R                      | 12  |
| TP34   | +           | -       | R                 | R    | R    | R            | R    | R     | R     | R      | R                | R   | R    | R  | S              | R  | R  | R                      | 15  |
| TP45   | +           | -       | S                 | S    | S    | S            | S    | nd    | S     | S      | S                | S   | S    | S  | R              | S  | S  | S                      | 1   |
| TP47   | -           | +       | S                 | S    | S    | S            | S    | nd    | S     | S      | S                | S   | S    | S  | R              | S  | S  | nd                     | 1   |
| TP51   | -           | -       | S                 | nd   | S    | R            | R    | R     | S     | S      | S                | S   | S    | S  | R              | S  | S  | S                      | 4   |
| TR57   | +           | -       | S                 | S    | S    | S            | S    | S     | S     | S      | S                | S   | S    | S  | S              | S  | S  | S                      | 0   |
| TR59   | +           | -       | S                 | nd   | S    | R            | R    | R     | S     | S      | R                | S   | S    | S  | S              | S  | R  | R                      | 6   |
| TR62   | -           | +       | S                 | S    | S    | S            | S    | nd    | S     | S      | S                | S   | S    | S  | R              | S  | S  | S                      | 1   |
| TR63   | -           | +       | S                 | S    | S    | S            | S    | nd    | S     | S      | S                | S   | S    | S  | R              | S  | S  | S                      | 1   |
| TR68   | +           | -       | S                 | nd   | S    | R            | R    | R     | S     | S      | S                | S   | S    | S  | R              | S  | R  | R                      | 6   |
| TR71   | -           | +       | S                 | S    | S    | S            | S    | nd    | S     | S      | S                | R   | S    | S  | S              | S  | S  | S                      | 1   |
| TR78   | +           | -       | S                 | S    | S    | S            | S    | S     | S     | S      | S                | S   | S    | S  | S              | S  | S  | S                      | 0   |
| TR79   | -           | -       | S                 | S    | S    | S            | S    | nd    | S     | S      | S                | S   | S    | S  | S              | S  | S  | S                      | 0   |
| TR89   | -           | -       | S                 | S    | S    | R            | R    | R     | S     | R      | R                | R   | R    | S  | S              | R  | R  | S                      | 9   |
| TR91   | -           | -       | S                 | nd   | S    | R            | R    | R     | S     | S      | S                | S   | S    | S  | R              | S  | R  | R                      | 6   |
| TR94   | +           | -       | R                 | R    | R    | R            | R    | R     | R     | R      | R                | S   | R    | S  | R              | S  | R  | R                      | 13  |
| TR100  | +           | +       | S                 | S    | S    | R            | R    | nd    | S     | S      | R                | R   | R    | S  | S              | S  | R  | R                      | 7   |
| TR101  | -           | -       | S                 | S    | S    | S            | S    | S     | S     | S      | S                | S   | S    | S  | S              | S  | S  | S                      | 0   |

<sup>1</sup> The concentration (in µg/ml) of the antibiotics assayed is indicated with a figure after the abbreviation. Fluoroquinolones: CIP, ciprofloxacin; NOR, norfloxacin; OFX, ofloxacin. Beta-lactams: IPM, imipenem; PIP, piperacillin; AMX, amoxicillin; AM, ampicillin; TIC, ticarcillin. Aminoglycosides: KM, kanamycin; GM, gentamicin; S, streptomycin. Macrolides (ML): ER, erythromycin. Glycopeptides (GP): VA, vancomycin. Cephalosporine (CP): CTX, cefotaxime. Tetracyclines (TC): TC, tetracycline. C, chloramphenicol;

**Supplementary Table S7. Reported maximum MIC values in previously published mercury resistant bacteria**

| Strains                                                                                                                                                                                                                                                      | Hg resistance: HgCl <sub>2</sub> MIC (mg L <sup>-1</sup> )              | Ecosystem           | <i>merA</i> / Comments                                                                                                                                                                                                       | Reference                                         |
|--------------------------------------------------------------------------------------------------------------------------------------------------------------------------------------------------------------------------------------------------------------|-------------------------------------------------------------------------|---------------------|------------------------------------------------------------------------------------------------------------------------------------------------------------------------------------------------------------------------------|---------------------------------------------------|
| <i>Pseudomonas putida</i> SP1                                                                                                                                                                                                                                | 81.456                                                                  | Seawater            | The <i>mer</i> operon was located on Tn5041 on the chromosome                                                                                                                                                                | ( <a href="#">Zhang et al., 2012</a> )            |
| <i>Bacillus megaterium</i> MB1                                                                                                                                                                                                                               | 2                                                                       | Marine sediments    | Tn21-type <i>mer</i> operon in one copy on the chromosome                                                                                                                                                                    | ( <a href="#">Huang et al., 1999</a> )            |
| <i>Aeromonas media</i><br><i>Bacillus</i> spp.<br><i>Citrobacter freundii</i><br><i>Vibrio</i> spp<br><i>Serratia marcescens</i>                                                                                                                             | 13.4<br>0.68 – 6.8<br>13.62<br>1.4 – 13.4<br>6.81                       | Estuarine sediments | <i>Aeromonas media</i> (+)<br><i>Citrobacter freundii</i> (+)<br><i>Bacillus, Vibrio, Serratia</i> (–)                                                                                                                       | ( <a href="#">Figueiredo et al., 2016</a> )       |
| <i>Bacillus</i> sp.; <i>Enterococcus</i> sp.<br><i>Bacillus</i> spp.<br><i>Halobacillus</i> spp., <i>Virgibacillus</i> sp.<br><i>Pseudomonas</i> sp.<br><i>Psychrobacter</i> sp.; <i>Kocuria</i> sp.<br><i>Brachybacterium</i> spp.<br><i>Halomonas</i> spp. | 20.36<br>≥ 27.152<br>≥ 27.152<br>≥ 27.152<br>≥ 27.152<br>≥ 27.152       | Marine sponges      | The <i>merA</i> gene was detected in all strains except <i>Enterococcus</i> sp., <i>Virgibacillus</i> sp., <i>Psychrobacter</i> sp., 2 of the 8 <i>Bacillus</i> sp. strains, and 1 of the 2 <i>Halobacillus</i> sp. strains. | ( <a href="#">Santos-Gandelman et al., 2014</a> ) |
| <i>Bacillus cereus</i><br><i>Lysinibacillus</i> sp.<br><i>Bacillus</i> sp.<br><i>Kocuria rosea</i><br><i>Microbacterium oxydans</i><br><i>Serratia marcescens</i><br><i>Ochrobactrum</i> sp.                                                                 | 8.15<br>16.3<br>27.15<br>5.4<br>27.15<br>16.3<br>16.3                   | Soils and sediments | The resistance mechanism was based on extracellular bioaccumulation through EPS                                                                                                                                              | ( <a href="#">François et al., 2012</a> )         |
| <i>Pseudomonas</i> spp.<br><i>Acinetobacter</i> spp.<br><i>Proteus</i> spp.<br><i>Serratia marcescens</i><br><i>Micrococcus</i> sp.<br><i>Klebsiella</i> spp.<br><i>Staphylococcus</i><br><i>Escherichia coli</i>                                            | 25–100<br>6.25–25<br>25–50<br>12.5–50<br>6.25<br>6.25–12.5<br>6.25–12.5 | Sediments and water | Not searched. Plasmids were detected in several <i>Serratia marcescens</i> and <i>Pseudomonas</i> strains                                                                                                                    | ( <a href="#">Kargar et al., 2012</a> )           |

|                                                                                                                                                                                                                                                                                                                                                    |                                                                |                                        |                                                                                                                                                                                  |                                              |
|----------------------------------------------------------------------------------------------------------------------------------------------------------------------------------------------------------------------------------------------------------------------------------------------------------------------------------------------------|----------------------------------------------------------------|----------------------------------------|----------------------------------------------------------------------------------------------------------------------------------------------------------------------------------|----------------------------------------------|
| <i>Bacillus</i> spp.                                                                                                                                                                                                                                                                                                                               | 6.25–12.5<br>6.25–12.5                                         |                                        |                                                                                                                                                                                  |                                              |
| <i>Enterobacter</i> spp.<br><i>Pseudomonas</i> spp.                                                                                                                                                                                                                                                                                                | 67.88 - 108.6<br>67.88 - 249.8                                 | Soils                                  | <i>merA</i> gene detected in 4 out of 6 <i>Pseudomonas</i> strains, and 1 of the 2 <i>Enterobacter</i> isolates. The strains with <i>merA</i> were capable of mercury reduction. | ( <a href="#">Giovannella et al., 2016</a> ) |
| <i>Psychrobacter</i> spp.<br><i>Pseudomonas</i> spp.                                                                                                                                                                                                                                                                                               | 13.5 – 27.1<br>20.4                                            | Brackish lagoon sediment               | Not searched. The two <i>Pseudomonas</i> strains and one <i>Psychrobacter</i> strain could reduce mercury.                                                                       | ( <a href="#">Pepi et al., 2011</a> )        |
| <i>Pseudomonas</i> spp.<br><i>Enterobacter</i> spp.<br><i>Serratia</i> spp.<br><i>Providencia alcalifaciens</i> .<br><i>Bacillus cereus</i>                                                                                                                                                                                                        | 0.73 – 3.12<br>1.11 – 1.49<br>1.49 – 2.5<br>2.5<br>1.36 – 2.61 | Soils after mining sewage treatments   | <i>merA</i> gene detected in one highly resistant <i>Pseudomonas</i> strain                                                                                                      | ( <a href="#">Cabral et al., 2013</a> )      |
| TP10 <i>Pseudomonas mohnii</i> ,<br>TP11 <i>Bacillus frigoritolerans</i> ,<br>TP13 <i>Pseudomonas mohnii</i> ,<br>TP14 <i>Pseudomonas mohnii</i> ,<br>TP15 <i>Pseudomonas</i> sp., TP16 <i>Bacillus</i> sp.<br>TP30 <i>Pseudomonas</i> sp., TR63 <i>Bacillus</i> sp.<br>TR94 <i>Ralstonia insidiosa</i> ,<br>TR100 <i>Burkholderia contaminans</i> | 60                                                             | Lake and river sediments, forest soils | TP10, TP11, TP13, TP14, TP15, TP16, TP30, TR94, TR100 (+)<br>TR63 (-)                                                                                                            | This Study                                   |

## References

- Cabral, L, Giovanella, P, Gianello, C, Bento, FM, Andrezza, R, and Camargo, FA (2013) Isolation and characterization of bacteria from mercury contaminated sites in Rio Grande do Sul, Brazil, and assessment of methylmercury removal capability of a *Pseudomonas putida* V1 strain, *Biodegradation* **24**: 319-331. <https://doi.org/10.1007/s10532-012-9588-z>
- Figueiredo, NL, Canário, J, O'Driscoll, NJ, Duarte, A, and Carvalho, C (2016) Aerobic Mercury-resistant bacteria alter Mercury speciation and retention in the Tagus Estuary (Portugal), *Ecotoxicol Environ Saf* **124**: 60-67. <https://doi.org/10.1016/j.ecoenv.2015.10.001>
- François, F, Lombard, C, Guigner, J-M, Soreau, P, Brian-Jaisson, F, Martino, G, Vandervennet, M, Garcia, D, Molinier,AL, Pignol,D, Peduzzi, J, Zirah,S and Rebuffat, S (2012) Isolation and characterization of environmental bacteria capable of extracellular biosorption of mercury, *Appl Environ Microbiol* **78**: 1097-1106. <https://doi.org/10.1128/AEM.06522-11>
- Giovanella, P, Cabral, L, Bento, FM, Gianello, C, and Camargo, FA (2016) Mercury (II) removal by resistant bacterial isolates and mercuric (II) reductase activity in a new strain of *Pseudomonas* sp. B50A, *N Biotechnol* **33**: 216-223. <https://doi.org/10.1016/j.nbt.2015.05.006>
- Huang, CC, Narita M Fau - Yamagata, T, Yamagata T Fau - Itoh, Y, Itoh Y Fau - Endo, G, and Endo, G (1999) Structure analysis of a class II transposon encoding the mercury resistance of the Gram-positive Bacterium bacillus megaterium MB1, a strain isolated from minamata bay, Japan, *Gene* **234**: 361-369.
- Kargar, M, Jahromi, M, Najafian, M, Khajeaian, P, Nahavandi, R, Jahromi, S, and Firoozinia, M (2012) Identification and molecular analysis of mercury resistant bacteria in Kor River, Iran., *Afr J Biotechnol* **11**: 6710-6717. <https://doi.org/10.5897/AJB11.3394>
- Pepi, M, Gaggi, C, Bernardini, E, Focardi, S, Lobianco, A, Ruta, M, Nicolardia, V, Volterraia, M, Gasperini, S, Trinchera, G, Renzi, P, Gabellini, M and Focardia, SE (2011) Mercury-resistant bacterial strains *Pseudomonas* and *Psychrobacter* spp. isolated from sediments of Orbetello Lagoon (Italy) and their possible use in bioremediation processes, *Int Biodeterior Biodegradation* **65**: 85-91. <https://doi.org/10.1016/j.ibiod.2010.09.006>
- Santos-Gandelman, JF, Giambiagi-deMarval, M, Muricy, G, Barkay, T, and Laport, MS (2014) Mercury and methylmercury detoxification potential by sponge-associated bacteria, *Antonie Van Leeuwenhoek* **106**: 585-590. <https://doi.org/10.1007/s10482-014-0224-2>
- Zhang, W, Chen, L, and Liu, D (2012) Characterization of a marine-isolated mercury-resistant *Pseudomonas putida* strain SP1 and its potential application in marine mercury reduction, *Appl Microbiol Biotechnol* **93**: 1305-1314. [10.1007/s00253-011-3454-5](https://doi.org/10.1007/s00253-011-3454-5)
